# Supplementary material
Source: publisher figshare collection journal article supplement (https://springernature.figshare.com/ndownloader/files/14800232)
Supplement: Supplementary file [file 14800232]

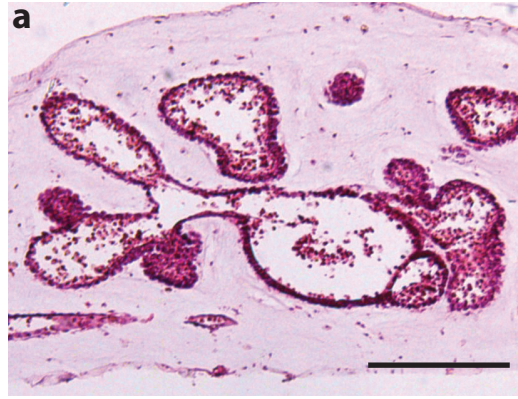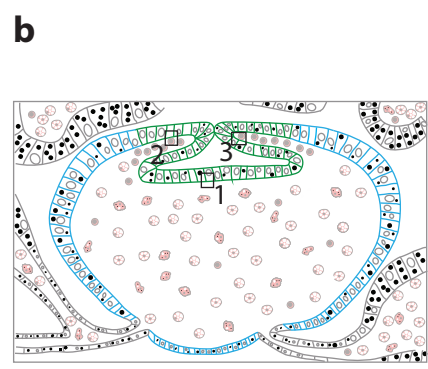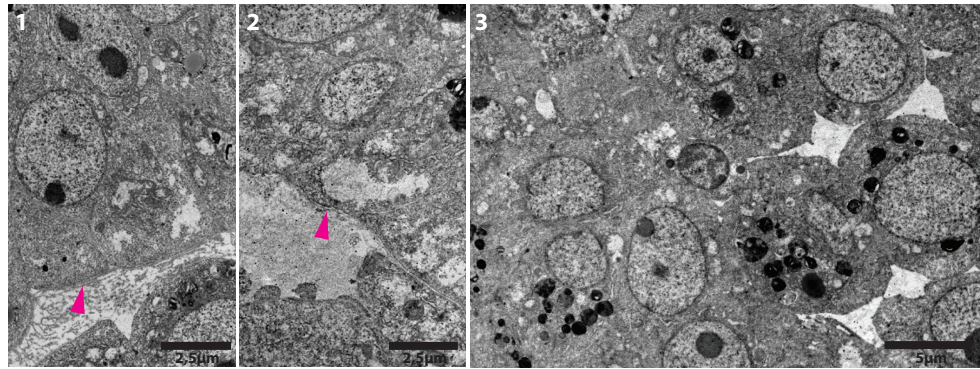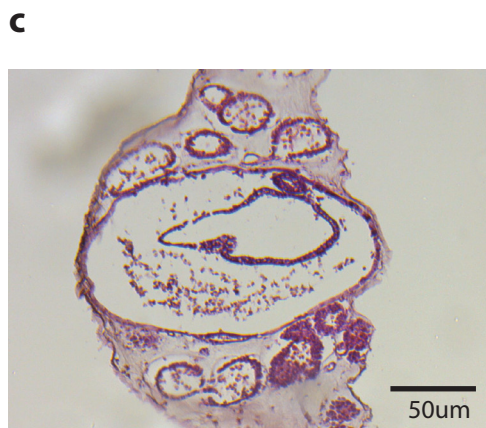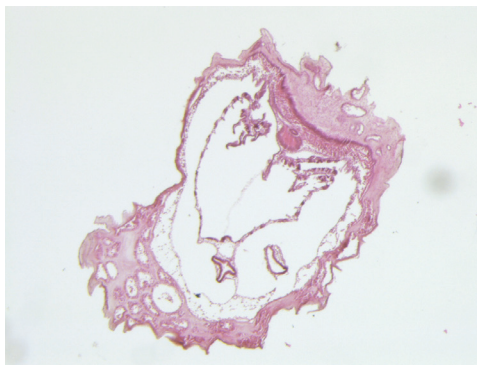

Supp. Fig. 5 **a** Paraffin section (stained with hematoxylin and eosin) showing a bud at the swelling stage and ampullae connected to it. **b** Electron microscopy showing the presence of basal lamina in areas (1) and (2) of the invaginating epidermis and its absence at the point of fusion (3) where hemoblasts cluster. **c** Paraffin sections (stained with hematoxylin and eosin) showing early organogenesis in the inner vesicle (left panel), and later stage where internal organs are visible (right panel)
